# Supplementary material for: Comparative proteomic analyses of urine from rat urothelial carcinoma chemically induced by exposure to N -butyl- N -(4-hydroxybutyl)-nitrosamine
Source: Royal Society of Chemistry journal article supplement (doi:10.1039/c4mb00606b), 2015-02-25
Supplement: c4mb00606b12.xlsx [file c4mb00606b12.xlsx]

## Sheet: Protein ID
Situation	Protein Acession	Protein Name	Score	Mass	Matches	emPAI
CONT	1433Z_RAT	14-3-3 protein zeta/delta	24	27754	4	0.37
BBN1	1433Z_RAT	14-3-3 protein zeta/delta	34	27754	3	0.17
BBN2	5HT6R_RAT	5-hydroxytryptamine receptor 6	20	46892	2	0.1
CONT	6PGL_RAT	6-phosphogluconolactonase	29	27217	1	0.17
CONT	A1AG_RAT	Alpha-1-acid glycoprotein	96	23560	3	0.44
BBN2	A1AG_RAT	Alpha-1-acid glycoprotein	118	23560	7	0.73
BBN1	A1AG_RAT	Alpha-1-acid glycoprotein	62	23560	2	0.44
CONT	A1AT_RAT	Alpha-1-antiproteinase	739	46107	31	2.08
BBN2	A1AT_RAT	Alpha-1-antiproteinase	819	46107	27	1.81
BBN1	A1AT_RAT	Alpha-1-antiproteinase	622	46107	23	2.07
CONT	A1BG_RAT	Alpha-1B-glycoprotein	369	56443	28	0.48
BBN2	A1BG_RAT	Alpha-1B-glycoprotein	743	56443	48	0.85
BBN1	A1BG_RAT	Alpha-1B-glycoprotein	699	56443	40	0.99
CONT	A1I3_RAT	Alpha-1-inhibitor 3	629	163670	64	0.53
BBN2	A1I3_RAT	Alpha-1-inhibitor 3	980	163670	77	0.7
BBN1	A1I3_RAT	Alpha-1-inhibitor 3	1012	163670	78	1.04
CONT	A1M_RAT	Alpha-1-macroglobulin	496	167019	24	0.24
BBN2	A1M_RAT	Alpha-1-macroglobulin	2383	167019	112	1.13
BBN1	A1M_RAT	Alpha-1-macroglobulin	1461	167019	90	1.01
CONT	ABHEB_RAT	Alpha/beta hydrolase domain-containing protein 14B	105	22604	8	1.15
BBN2	ACSL3_RAT	Long-chain-fatty-acid--CoA ligase 3	31	80406	5	0.06
CONT	ACTB_RAT	Actin, cytoplasmic 1	107	41710	9	0.53
BBN2	ACTB_RAT	Actin, cytoplasmic 1	237	41710	19	0.51
BBN1	ACTB_RAT	Actin, cytoplasmic 1	429	41710	17	1.06
BBN2	ACTT1_RAT	Actin-related protein T1	20	42167	4	0.11
BBN1	ADA_RAT	Adenosine deaminase	59	39874	2	0.11
BBN1	ADH7_RAT	Alcohol dehydrogenase class 4 mu/sigma chain	24	40079	2	0.12
BBN1	ADO_RAT	Aldehyde oxidase	19	146826	15	0.03
BBN1	ADRB3_RAT	Beta-3 adrenergic receptor	23	43119	1	0.11
BBN2	AFAM_RAT	Afamin	110	69290	13	0.28
BBN1	AFAM_RAT	Afamin	52	69290	9	0.13
BBN2	AGRIN_RAT	Agrin	25	208509	25	0.02
CONT	AKIR2_RAT	Akirin-2	27	22115	1	0.22
BBN2	AKIR2_RAT	Akirin-2	20	22115	8	0.21
BBN1	AKIR2_RAT	Akirin-2	21	22115	4	0.21
BBN2	AL3A1_RAT	Aldehyde dehydrogenase, dimeric NADP-preferring	57	50307	5	0.19
CONT	ALBU_RAT	Serum albumin	5255	68686	169	16.15
BBN2	ALBU_RAT	Serum albumin	7413	68686	196	17.27
BBN1	ALBU_RAT	Serum albumin	6059	68686	155	8.59
BBN2	ALDOA_RAT	Fructose-bisphosphate aldolase A	21	39327	2	0.12
BBN2	ALDR_RAT	Aldose reductase	38	35774	4	0.13
CONT	AMBP_RAT	Protein AMBP	149	38826	9	0.57
BBN2	AMBP_RAT	Protein AMBP	124	38826	7	0.56
BBN1	AMBP_RAT	Protein AMBP	150	38826	6	0.39
CONT	AMOL2_RAT	Angiomotin-like protein 2	28	85535	8	0.05
BBN2	AMPN_RAT	Aminopeptidase N	63	109380	3	0.08
CONT	AMYP_RAT	Pancreatic alpha-amylase	396	57141	18	0.26
BBN2	AMYP_RAT	Pancreatic alpha-amylase	231	57141	14	0.16
BBN1	AMYP_RAT	Pancreatic alpha-amylase	434	57141	18	0.46
CONT	ANGT_RAT	Angiotensinogen	41	51949	3	0.09
BBN2	ANGT_RAT	Angiotensinogen	34	51949	6	0.09
BBN1	ANGT_RAT	Angiotensinogen	34	51949	4	0.09
CONT	ANTR1_RAT	Anthrax toxin receptor 1	55	62280	2	0.07
BBN2	ANTR1_RAT	Anthrax toxin receptor 1	33	62280	5	0.07
BBN1	ANTR1_RAT	Anthrax toxin receptor 1	24	62280	5	0.07
CONT	ANXA1_RAT	Annexin A1	125	38805	10	0.95
BBN2	ANXA1_RAT	Annexin A1	146	38805	13	0.74
BBN2	APC_RAT	Adenomatous polyposis coli protein	18	310342	13	0.01
BBN1	APC_RAT	Adenomatous polyposis coli protein	30	310342	23	0.03
CONT	APOA1_RAT	Apolipoprotein A-I	88	30043	6	0.55
BBN2	APOA1_RAT	Apolipoprotein A-I	391	30043	29	2.62
BBN1	APOA1_RAT	Apolipoprotein A-I	69	30043	7	0.33
CONT	APOA4_RAT	Apolipoprotein A-IV	30	44429	5	0.1
BBN1	APOB_RAT	Apolipoprotein B-100	30	535688	16	0.02
CONT	APOE_RAT	Apolipoprotein E	253	35731	28	1.96
BBN2	APOE_RAT	Apolipoprotein E	1025	35731	47	2.77
BBN1	APOE_RAT	Apolipoprotein E	288	35731	21	0.82
CONT	APOH_RAT	Beta-2-glycoprotein 1	67	33175	6	0.3
BBN2	APOH_RAT	Beta-2-glycoprotein 1	87	33175	9	0.3
BBN1	APOH_RAT	Beta-2-glycoprotein 1	68	33175	6	0.29
CONT	APOM_RAT	Apolipoprotein M	27	21499	2	0.22
BBN2	APOM_RAT	Apolipoprotein M	25	21499	1	0.22
BBN1	APOM_RAT	Apolipoprotein M	21	21499	2	0.22
BBN2	AT12A_RAT	Potassium-transporting ATPase alpha chain 2	19	114902	6	0.04
BBN1	AT2B1_RAT	Plasma membrane calcium-transporting ATPase 1	20	138632	8	0.03
BBN2	ATP9B_RAT	Probable phospholipid-transporting ATPase IIB	26	129095	7	0.03
CONT	B2MG_RAT	Beta-2-microglobulin	108	13711	4	0.36
BBN2	B2MG_RAT	Beta-2-microglobulin	58	13711	3	0.36
BBN1	B2MG_RAT	Beta-2-microglobulin	76	13711	1	0.36
BBN1	BFAR_RAT	Bifunctional apoptosis	16	52990	2	0.09
CONT	BFSP1_RAT	Filensin (Fragment)	17	67997	31	0.07
BBN2	BFSP1_RAT	Filensin (Fragment)	20	67997	12	0.07
BBN1	BFSP1_RAT	Filensin (Fragment)	20	67997	26	0.07
CONT	BGLR_RAT	Beta-glucuronidase	267	74746	16	0.6
BBN2	BGLR_RAT	Beta-glucuronidase	97	74746	5	0.19
BBN1	BGLR_RAT	Beta-glucuronidase	1172	74746	63	1.25
BBN2	BMP3B_RAT	Bone morphogenetic protein 3B	25	52927	7	0.09
CONT	BRCA2_RAT	Breast cancer type 2 susceptibility protein homolog	26	371984	7	0.01
CONT	CAC1E_RAT	Voltage-dependent R-type calcium channel subunit alpha-1E	19	251954	2	0.02
BBN2	CAC1E_RAT	Voltage-dependent R-type calcium channel subunit alpha-1E	23	251954	11	0.02
BBN1	CAC1E_RAT	Voltage-dependent R-type calcium channel subunit alpha-1E	26	251954	14	0.02
BBN2	CACO1_RAT	Calcium-binding and coiled-coil domain-containing protein 1	27	77227	6	0.06
CONT	CAD23_RAT	Cadherin-23	43	365230	10	0.01
BBN2	CAD23_RAT	Cadherin-23	83	365230	19	0.01
BBN1	CAD23_RAT	Cadherin-23	73	365230	23	0.01
CONT	CADH1_RAT	Cadherin-1	524	98654	17	0.31
BBN2	CADH1_RAT	Cadherin-1	550	98654	14	0.36
BBN1	CADH1_RAT	Cadherin-1	680	98654	15	0.19
BBN1	CADH6_RAT	Cadherin-6	19	88286	4	0.05
BBN2	CAH1_RAT	Carbonic anhydrase 1	189	28282	6	0.86
BBN1	CAH1_RAT	Carbonic anhydrase 1	87	28282	9	0.83
BBN2	CALM_RAT	Calmodulin	41	16827	3	0.29
BBN1	CALM_RAT	Calmodulin	30	16827	1	0.28
BBN1	CAND1_RAT	Cullin-associated NEDD8-dissociated protein 1	27	136275	8	0.03
BBN2	CART_RAT	Cocaine- and amphetamine-regulated transcript protein	22	14131	4	0.35
CONT	CATB_RAT	Cathepsin B	97	37446	3	0.26
BBN2	CATB_RAT	Cathepsin B	97	37446	3	0.12
BBN1	CATB_RAT	Cathepsin B	32	37446	7	0.26
BBN2	CATD_RAT	Cathepsin D	30	44652	2	0.1
CONT	CATL1_RAT	Cathepsin L1	52	37636	3	0.12
BBN2	CATL1_RAT	Cathepsin L1	36	37636	1	0.12
CONT	CBG_RAT	Corticosteroid-binding globulin	82	44642	7	0.34
BBN2	CBG_RAT	Corticosteroid-binding globulin	146	44642	5	0.21
BBN1	CBG_RAT	Corticosteroid-binding globulin	239	44642	7	0.62
CONT	CBP_RAT	CREB-binding protein	26	265255	19	0.02
BBN2	CBP_RAT	CREB-binding protein	24	265255	26	0.02
BBN2	CBPA1_RAT	Carboxypeptidase A1	26	47168	2	0.1
BBN2	CBPQ_RAT	Carboxypeptidase Q	38	52009	4	0.09
CONT	CC153_RAT	Coiled-coil domain-containing protein 153	23	23393	1	0.2
BBN1	CC153_RAT	Coiled-coil domain-containing protein 153	29	23393	3	0.2
CONT	CCD71_RAT	Coiled-coil domain-containing protein 71	26	46434	3	0.1
CONT	CDYL_RAT	Chromodomain Y-like protein	27	64990	2	0.07
BBN1	CDYL_RAT	Chromodomain Y-like protein	31	64990	4	0.07
CONT	CE57L_RAT	Centrosomal protein CEP57L1	18	50243	2	0.09
BBN2	CEAM3_RAT	Carcinoembryonic antigen-related cell adhesion molecule 3	26	78262	8	0.06
CONT	CELR2_RAT	Cadherin EGF LAG seven-pass G-type receptor 2 (Fragment)	22	233333	6	0.02
BBN2	CEP95_RAT	Centrosomal protein of 95 kDa	22	94449	11	0.05
CONT	CERU_RAT	Ceruloplasmin	1082	120764	49	0.72
BBN2	CERU_RAT	Ceruloplasmin	2324	120764	92	1.46
BBN1	CERU_RAT	Ceruloplasmin	953	120764	45	0.38
BBN1	CES1D_RAT	Carboxylesterase 1D	23	62108	4	0.07
CONT	CFAD_RAT	Complement factor D	28	28424	2	0.17
BBN2	CFAD_RAT	Complement factor D	44	28424	3	0.16
BBN1	CFAD_RAT	Complement factor D	55	28424	3	0.16
CONT	CHIA_RAT	Acidic mammalian chitinase	21	51918	1	0.09
BBN1	CHIA_RAT	Acidic mammalian chitinase	55	51918	1	0.09
CONT	CJ088_RAT	Uncharacterized protein C10orf88 homolog	16	48789	2	0.09
CONT	CK2N2_RAT	Calcium/calmodulin-dependent protein kinase II inhibitor 2	22	8622	3	0.62
CONT	CLUS_RAT	Clusterin	39	51342	9	0.09
BBN2	CLUS_RAT	Clusterin	225	51342	31	0.66
BBN1	CLUS_RAT	Clusterin	68	51342	7	0.18
CONT	CNDH2_RAT	Condensin-2 complex subunit H2	17	62598	5	0.07
CONT	CO3_RAT	Complement C3	667	186342	65	0.56
BBN2	CO3_RAT	Complement C3	1239	186342	73	0.6
BBN1	CO3_RAT	Complement C3	942	186342	80	0.38
CONT	CO4_RAT	Complement C4	98	192042	19	0.07
BBN2	CO4_RAT	Complement C4	295	192042	31	0.1
BBN1	CO4_RAT	Complement C4	114	192042	33	0.07
BBN2	COM1_RAT	DNA endonuclease RBBP8	26	100642	10	0.04
BBN1	CP013_RAT	UPF0585 protein C16orf13 homolog	27	22598	2	0.21
BBN2	CP086_RAT	Uncharacterized protein C16orf86 homolog	20	32077	1	0.14
CONT	CPSF5_RAT	Cleavage and polyadenylation specificity factor subunit 5	27	26224	7	0.18
BBN1	CPSF5_RAT	Cleavage and polyadenylation specificity factor subunit 5	23	26224	4	0.18
CONT	CRP_RAT	C-reactive protein	113	25452	4	0.4
BBN2	CRP_RAT	C-reactive protein	149	25452	5	0.4
BBN1	CRP_RAT	C-reactive protein	124	25452	5	0.4
CONT	CTBP2_RAT	C-terminal-binding protein 2	27	48956	7	0.09
BBN1	CTP5B_RAT	Contactin-associated protein like 5-2	21	144068	11	0.03
CONT	CUBN_RAT	Cubilin	48	398732	8	0.01
CONT	CYTC_RAT	Cystatin-C	794	15427	11	0.74
BBN2	CYTC_RAT	Cystatin-C	754	15427	12	1.28
BBN1	CYTC_RAT	Cystatin-C	673	15427	10	0.73
BBN1	DAB2P_RAT	Disabled homolog 2-interacting protein	20	109936	2	0.04
CONT	DAPK3_RAT	Death-associated protein kinase 3	24	51418	8	0.09
BBN2	DAPK3_RAT	Death-associated protein kinase 3	19	51418	4	0.09
BBN2	DCXR_RAT	L-xylulose reductase	29	25703	6	0.18
BBN1	DGKZ_RAT	Diacylglycerol kinase zeta	28	103943	9	0.04
CONT	DIAC_RAT	Di-N-acetylchitobiase	24	41504	1	0.11
BBN2	DNA2_RAT	DNA replication ATP-dependent helicase/nuclease DNA2	25	119512	14	0.04
CONT	DNAS1_RAT	Deoxyribonuclease-1	599	32044	35	2.88
BBN2	DNAS1_RAT	Deoxyribonuclease-1	787	32044	34	3.37
BBN1	DNAS1_RAT	Deoxyribonuclease-1	771	32044	33	2.8
CONT	DNJA2_RAT	DnaJ homolog subfamily A member 2	29	45737	6	0.1
CONT	DPP2_RAT	Dipeptidyl peptidase 2	110	55079	7	0.17
BBN2	DPP2_RAT	Dipeptidyl peptidase 2	36	55079	6	0.08
BBN1	DPP2_RAT	Dipeptidyl peptidase 2	70	55079	4	0.17
CONT	DPP4_RAT	Dipeptidyl peptidase 4	32	88033	6	0.05
CONT	DPP6_RAT	Dipeptidyl aminopeptidase-like protein 6	19	97241	2	0.05
BBN2	DPP6_RAT	Dipeptidyl aminopeptidase-like protein 6	20	97241	6	0.05
BBN1	DPP6_RAT	Dipeptidyl aminopeptidase-like protein 6	16	97241	10	0.05
BBN2	DUS12_RAT	Dual specificity protein phosphatase 12	25	37173	7	0.12
BBN2	DYH1_RAT	Dynein heavy chain 1, axonemal	24	514692	44	0.01
CONT	DYH7_RAT	Dynein heavy chain 7, axonemal	13	464259	18	0.01
CONT	DYHC2_RAT	Cytoplasmic dynein 2 heavy chain 1	32	491908	23	0.01
BBN2	DYHC2_RAT	Cytoplasmic dynein 2 heavy chain 1	26	491908	19	0.01
BBN1	DYHC2_RAT	Cytoplasmic dynein 2 heavy chain 1	49	491908	23	0.01
CONT	DYN3_RAT	Dynamin-3	29	97853	6	0.05
BBN1	EF2_RAT	Elongation factor 2	19	95223	12	0.05
CONT	EFGM_RAT	Elongation factor	16	83404	3	0.05
CONT	EGF_RAT	Pro-epidermal growth factor	2245	124046	99	1.52
BBN2	EGF_RAT	Pro-epidermal growth factor	1167	124046	58	0.82
BBN1	EGF_RAT	Pro-epidermal growth factor	1353	124046	81	0.94
CONT	ENOA_RAT	Alpha-enolase	53	47098	3	0.1
BBN2	ENOA_RAT	Alpha-enolase	34	47098	2	0.1
BBN1	ENOB_RAT	Beta-enolase	18	46984	1	0.1
CONT	ESAM_RAT	Endothelial cell-selective adhesion molecule	67	41910	4	0.23
BBN2	ESAM_RAT	Endothelial cell-selective adhesion molecule	33	41910	7	0.11
BBN1	ESPN_RAT	Espin	27	90513	15	0.05
BBN2	EST1C_RAT	Carboxylesterase 1C	33	60136	2	0.07
BBN2	EST5_RAT	Liver carboxylesterase B-1	30	62455	7	0.07
BBN2	EZRI_RAT	Ezrin	73	69348	14	0.06
BBN1	F110C_RAT	Protein FAM110C	28	35556	5	0.13
BBN2	FA12_RAT	Coagulation factor XII	26	65801	5	0.07
BBN1	FABP4_RAT	Fatty acid-binding protein, adipocyte	27	14699	2	0.33
CONT	FACD2_RAT	Fanconi anemia group D2 protein homolog	25	163517	6	0.03
CONT	FBLN3_RAT	EGF-containing fibulin	16	54560	3	0.08
BBN2	FBLN3_RAT	EGF-containing fibulin	13	54560	7	0.08
BBN1	FBLN3_RAT	EGF-containing fibulin-like extracellular matrix protein 1	22	54560	3	0.08
CONT	FER_RAT	Tyrosine-protein kinase Fer	33	94255	3	0.05
CONT	FETUA_RAT	Alpha-2-HS-glycoprotein	43	37958	7	0.12
BBN2	FETUA_RAT	Alpha-2-HS-glycoprotein	88	37958	5	0.26
BBN1	FETUA_RAT	Alpha-2-HS-glycoprotein	39	37958	6	0.12
CONT	FETUB_RAT	Fetuin-B	462	41506	26	1.07
BBN2	FETUB_RAT	Fetuin-B	353	41506	19	0.87
BBN1	FETUB_RAT	Fetuin-B	197	41506	14	0.68
CONT	FIBA_RAT	Fibrinogen alpha chain	106	86632	5	0.11
BBN2	FIBA_RAT	Fibrinogen alpha chain	323	86632	22	0.57
BBN1	FIBA_RAT	Fibrinogen alpha chain	118	86632	16	0.16
CONT	FIBB_RAT	Fibrinogen beta chain	226	54201	11	0.75
BBN2	FIBB_RAT	Fibrinogen beta chain	519	54201	17	1.61
BBN1	FIBB_RAT	Fibrinogen beta chain	141	54201	12	0.49
CONT	FIBG_RAT	Fibrinogen gamma chain	185	50600	15	0.84
BBN2	FIBG_RAT	Fibrinogen gamma chain	436	50600	34	1.16
BBN1	FIBG_RAT	Fibrinogen gamma chain	95	50600	16	0.41
CONT	FINC_RAT	Fibronectin	121	272341	11	0.05
BBN2	FINC_RAT	Fibronectin	468	272341	37	0.17
BBN1	FINC_RAT	Fibronectin	104	272341	26	0.08
BBN2	FMR1_RAT	Fragile X mental retardation protein 1 homolog	25	66740	4	0.07
BBN1	FOSL2_RAT	Fos-related antigen 2	24	35234	3	0.13
CONT	FRMD8_RAT	FERM domain-containing	14	51749	8	0.09
CONT	GAK_RAT	Cyclin-G-associated kinase	20	143613	12	0.03
BBN2	GDN_RAT	Glia-derived nexin	21	44035	3	0.1
CONT	GELS_RAT	Gelsolin	59	86014	11	0.05
BBN2	GELS_RAT	Gelsolin	72	86014	19	0.16
BBN1	GELS_RAT	Gelsolin	88	86014	4	0.05
BBN1	GNN_RAT	Tetratricopeptide repeat protein GNN	22	150190	5	0.03
BBN2	GOGA4_RAT	Golgin subfamily A member 4	30	260032	21	0.02
CONT	GP2_RAT	Pancreatic secretory granule membrane major glycoprotein GP2	33	58670	3	0.08
BBN2	GP2_RAT	Pancreatic secretory granule membrane major glycoprotein GP2	29	58670	3	0.08
BBN1	GP2_RAT	Pancreatic secretory granule membrane major glycoprotein GP2	28	58670	4	0.08
CONT	GRK6_RAT		19	0	5	0.07
CONT	GRM3_RAT	Metabotropic glutamate receptor 3	21	98896	2	0.05
CONT	GRN_RAT	Granulins	161	63325	5	0.32
BBN2	GRN_RAT	Granulins	37	63325	3	0.07
BBN1	GRN_RAT	Granulins	37	63325	4	0.07
CONT	GSTA1_RAT	Glutathione S-transferase alpha-1	48	25591	4	0.41
BBN2	GSTA1_RAT	Glutathione S-transferase alpha-1	55	25591	2	0.18
BBN1	GSTA1_RAT	Glutathione S-transferase alpha-1	34	25591	9	0.39
BBN2	GSTA2_RAT	Glutathione S-transferase alpha-2	145	25543	9	0.4
BBN1	GSTA3_RAT	Glutathione S-transferase alpha-3	374	25303	18	0.96
BBN2	GSTA4_RAT	Glutathione S-transferase alpha-4	94	25493	4	0.4
BBN1	GSTA4_RAT	Glutathione S-transferase alpha-4	158	25493	12	0.95
CONT	GSTM1_RAT	Glutathione S-transferase Mu 1	27	25897	4	0.18
BBN2	GSTM1_RAT	Glutathione S-transferase Mu 1	61	25897	4	0.18
BBN1	GSTM1_RAT	Glutathione S-transferase Mu 1	216	25897	18	1.69
BBN2	GSTP1_RAT	Glutathione S-transferase P	302	23424	5	0.73
BBN1	GSTP1_RAT	Glutathione S-transferase P	185	23424	5	0.44
BBN2	GUC2F_RAT	Retinal guanylyl cyclase 2	27	124331	12	0.04
BBN2	HA11_RAT	Class I histocompatibility antigen, Non-RT1.A alpha-1 chain	44	36547	3	0.13
CONT	HA12_RAT	RT1 class I histocompatibility antigen, AA alpha chain	24	41804	1	0.11
CONT	HBA_RAT	Hemoglobin subunit alpha-1/2	949	15319	39	4.42
BBN2	HBA_RAT	Hemoglobin subunit alpha-1/2	1649	15319	37	14.85
BBN1	HBA_RAT	Hemoglobin subunit alpha-1/2	1534	15319	44	10.88
CONT	HBB1_RAT	Hemoglobin subunit beta-1	776	15969	40	10.39
BBN2	HBB1_RAT	Hemoglobin subunit beta-1	2760	15969	57	89.72
BBN1	HBB1_RAT	Hemoglobin subunit beta-1	4781	15969	85	51.35
CONT	HBB2_RAT	Hemoglobin subunit beta-2	503	15972	28	4.06
BBN2	HBB2_RAT	Hemoglobin subunit beta-2	2229	15972	47	18.87
BBN1	HBB2_RAT	Hemoglobin subunit beta-2	2799	15972	60	39.21
BBN1	HEM2_RAT	Delta-aminolevulinic acid dehydratase	21	36008	8	0.13
CONT	HEMO_RAT	Hemopexin	126	51318	11	0.66
BBN2	HEMO_RAT	Hemopexin	513	51318	34	2.26
BBN1	HEMO_RAT	Hemopexin	451	51318	25	1.32
CONT	HIF1A_RAT	Hypoxia-inducible factor 1-alpha	18	92260	4	0.05
CONT	HPT_RAT	Haptoglobin	65	38539	4	0.12
BBN2	HPT_RAT	Haptoglobin	278	38539	17	0.96
BBN1	HPT_RAT	Haptoglobin	186	38539	12	1.44
CONT	HRG_RAT	Histidine-rich glycoprotein	171	59012	7	0.25
BBN2	HRG_RAT	Histidine-rich glycoprotein	104	59012	7	0.25
BBN1	HRG_RAT	Histidine-rich glycoprotein	51	59012	5	0.16
BBN1	HSP7C_RAT	Heat shock cognate 71 kDa protein	187	70827	8	0.2
CONT	HVR01_RAT	Ig heavy chain V region IR2	26	16014	3	0.3
CONT	HYAL1_RAT	Hyaluronidase-1	28	50612	3	0.09
BBN2	I23O1_RAT	Indoleamine 2,3-dioxygenase 1	25	45802	1	0.1
BBN1	I23O1_RAT	Indoleamine 2,3-dioxygenase 1	25	45802	5	0.1
BBN2	IC1_RAT	Plasma protease C1 inhibitor	59	55576	6	0.17
BBN2	IFRD1_RAT	Interferon-related developmental regulator 1	17	49751	3	0.09
CONT	IGG2A_RAT	Ig gamma-2A chain C region	1009	35163	39	3.91
BBN2	IGG2A_RAT	Ig gamma-2A chain C region	1313	35163	43	4.56
BBN1	IGG2A_RAT	Ig gamma-2A chain C region	571	35163	32	1.99
CONT	IGG2B_RAT	Ig gamma-2B chain C region	34	36474	3	0.27
BBN2	IGG2B_RAT	Ig gamma-2B chain C region	38	36474	3	0.13
BBN1	IGG2B_RAT	Ig gamma-2B chain C region	29	36474	6	0.26
CONT	IGG2C_RAT	Ig gamma-2C chain C region	26	36548	2	0.13
CONT	IGHG1_RAT	Ig gamma-1 chain C region	95	35923	9	0.43
BBN2	IGHG1_RAT	Ig gamma-1 chain C region	163	35923	10	0.43
BBN1	IGHG1_RAT	Ig gamma-1 chain C region	38	35923	4	0.43
CONT	IL4RA_RAT	Interleukin-4 receptor subunit alpha	102	86663	3	0.05
BBN2	IL4RA_RAT	Interleukin-4 receptor subunit alpha	111	86663	10	0.05
BBN1	IL4RA_RAT	Interleukin-4 receptor subunit alpha	92	86663	7	0.05
BBN2	INP5E_RAT	72 kDa inositol polyphosphate 5-phosphatase	32	72193	10	0.06
CONT	ITIH3_RAT	Inter-alpha-trypsin inhibitor heavy chain H3	167	99036	24	0.25
BBN2	ITIH3_RAT	Inter-alpha-trypsin inhibitor heavy chain H3	333	99036	19	0.3
BBN1	ITIH3_RAT	Inter-alpha-trypsin inhibitor heavy chain H3	37	99036	11	0.09
CONT	JAG1_RAT	Protein jagged-1	24	134236	4	0.03
BBN2	JMJD8_RAT	JmjC domain-containing protein 8	25	32908	6	0.14
CONT	JPH4_RAT	Junctophilin-4	27	66401	7	0.07
BBN1	K0319_RAT	Dyslexia-associated protein KIAA0319 homolog	28	117939	2	0.04
CONT	K1C10_RAT	Keratin, type I cytoskeletal 10	63	56470	2	0.08
BBN2	K1C10_RAT	Keratin, type I cytoskeletal 10	54	56470	9	0.08
BBN1	K1C10_RAT	Keratin, type I cytoskeletal 10	92	56470	10	0.16
CONT	K1C14_RAT	Keratin, type I cytoskeletal 14	41	52651	5	0.09
BBN2	K1C14_RAT	Keratin, type I cytoskeletal 14	27	52651	3	0.18
CONT	K1C17_RAT	Keratin, type I cytoskeletal 17	29	48093	7	0.09
CONT	K1C19_RAT	Keratin, type I cytoskeletal 19	25	44609	4	0.1
BBN2	K1C19_RAT	Keratin, type I cytoskeletal 19	102	44609	10	0.21
BBN1	K1C19_RAT	Keratin, type I cytoskeletal 19	29	44609	5	0.1
CONT	K2C1_RAT	Keratin, type II cytoskeletal 1	83	64791	18	0.23
BBN1	K2C1_RAT	Keratin, type II cytoskeletal 1	344	64791	20	0.22
CONT	K2C1B_RAT	Keratin, type II cytoskeletal 1b	168	57220	15	0.17
BBN2	K2C1B_RAT	Keratin, type II cytoskeletal 1b	220	57220	14	0.26
BBN1	K2C1B_RAT	Keratin, type II cytoskeletal 1b	123	57220	3	0.18
BBN2	K2C4_RAT	Keratin, type II cytoskeletal 4	77	57631	13	0.16
CONT	K2C5_RAT	Keratin, type II cytoskeletal 5	105	61788	9	0.33
BBN1	K2C5_RAT	Keratin, type II cytoskeletal 5	207	61788	19	0.32
CONT	K2C6A_RAT	Keratin, type II cytoskeletal 6A	80	59213	13	0.25
BBN2	K2C6A_RAT	Keratin, type II cytoskeletal 6A	82	59213	11	0.25
BBN1	K2C6A_RAT	Keratin, type II cytoskeletal 6A	143	59213	15	0.34
BBN2	K2C7_RAT	Keratin, type II cytoskeletal 7	103	50678	9	0.29
BBN1	K2C7_RAT	Keratin, type II cytoskeletal 7	66	50678	7	0.18
CONT	K2C8_RAT	Keratin, type II cytoskeletal 8	59	53985	16	0.28
BBN2	K2C8_RAT	Keratin, type II cytoskeletal 8	176	53985	23	0.38
BBN1	K2C8_RAT	Keratin, type II cytoskeletal 8	190	53985	22	0.27
BBN2	K6PL_RAT	6-phosphofructokinase, liver type	24	85284	3	0.05
CONT	KACB_RAT	Ig kappa chain C region, B allele	920	11594	30	167.8
BBN2	KACB_RAT	Ig kappa chain C region, B allele	716	11594	22	53.16
BBN1	KACB_RAT	Ig kappa chain C region, B allele	1081	11594	36	108.54
CONT	KAD8_RAT	Adenylate kinase 8	27	54931	10	0.08
BBN1	KAT6A_RAT	Histone acetyltransferase KAT6A	28	223190	23	0.02
CONT	KDIS_RAT	Kinase D-interacting substrate of 220 kDa	26	195594	12	0.02
BBN1	KIF3C_RAT	Kinesin-like protein KIF3C	29	89760	23	0.05
BBN1	KLHL7_RAT	Kelch-like protein 7	27	65927	18	0.07
CONT	KLK1_RAT	Kallikrein-1	434	28833	17	0.57
BBN2	KLK1_RAT	Kallikrein-1	511	28833	15	1.11
BBN1	KLK1_RAT	Kallikrein-1	428	28833	13	1.43
CONT	KLK6_RAT	Prostatic glandular kallikrein-6	217	28994	11	0.35
BBN1	KLK6_RAT	Prostatic glandular kallikrein-6	182	28994	5	0.37
CONT	KLK7_RAT	Glandular kallikrein-7, submandibular/renal	401	28953	13	1.12
BBN2	KLK7_RAT	Glandular kallikrein-7, submandibular/renal	462	28953	16	0.81
BBN1	KLK7_RAT	Glandular kallikrein-7, submandibular/renal	214	28953	10	0.34
BBN2	KNG1_RAT	Kininogen-1	65	70889	3	0.13
CONT	KNT1_RAT	T-kininogen 1	210	47745	11	0.31
BBN2	KNT1_RAT	T-kininogen 1	744	47745	19	0.89
BBN1	KNT1_RAT	T-kininogen 1	408	47745	9	0.43
CONT	KNT2_RAT	T-kininogen 2	67	47673	2	0.2
BBN2	KNT2_RAT	T-kininogen 2	953	47673	32	1.97
BBN1	KNT2_RAT	T-kininogen 2	215	47673	8	0.31
CONT	KPCD_RAT	Protein kinase C delta type	24	77470	5	0.06
CONT	LAC2_RAT	Ig lambda-2 chain C region	558	11311	18	12.63
BBN2	LAC2_RAT	Ig lambda-2 chain C region	839	11311	21	18.26
BBN1	LAC2_RAT	Ig lambda-2 chain C region	362	11311	11	5.3
BBN1	LANC1_RAT	LanC-like protein 1	23	45210	2	0.1
CONT	LEG3_RAT	Galectin-3	50	27184	1	0.17
CONT	LEG5_RAT	Galectin-5	179	16186	5	0.7
BBN2	LEG5_RAT	Galectin-5	142	16186	7	0.69
BBN1	LEG5_RAT	Galectin-5	78	16186	2	0.3
CONT	LEG9_RAT	Galectin-9	42	39920	7	0.12
CONT	LIFR_RAT	Leukemia inhibitory factor receptor	42	122317	11	0.04
CONT	LIMD2_RAT	LIM domain-containing protein 2	28	14227	4	0.35
BBN2	LIPA4_RAT	Liprin-alpha-4 (Fragment)	27	117931	6	0.04
BBN2	LMNB1_RAT	Lamin-B1	26	66566	10	0.07
BBN2	LONP2_RAT	Lon protease homolog 2, peroxisomal	23	94334	9	0.05
CONT	LPHN3_RAT	Latrophilin-3	19	172333	3	0.03
CONT	LPPR4_RAT	Lipid phosphate phosphatase-related protein type 4	26	83309	4	0.05
CONT	LRC33_RAT	Leucine-rich repeat-containing protein 33	24	77022	3	0.06
BBN1	LRC33_RAT	Leucine-rich repeat-containing protein 33	24	77022	6	0.06
BBN1	LRIT1_RAT	Leucine-rich repeat, immunoglobulin-like domain and transmembrane domain-containing protein 1	30	68373	10	0.07
CONT	LRP2_RAT	Low-density lipoprotein receptor-related protein 2	274	518937	18	0.05
BBN2	LRP2_RAT	Low-density lipoprotein receptor-related protein 2	49	518937	31	0.01
BBN1	LRP2_RAT	Low-density lipoprotein receptor-related protein 2	89	518937	10	0.03
BBN1	LZTS2_RAT	Leucine zipper putative tumor suppressor 2	23	72449	2	0.06
BBN1	MACF1_RAT	Microtubule-actin cross-linking factor 1	24	619216	10	0.01
CONT	MAGI2_RAT	Membrane-associated guanylate kinase, WW and PDZ domain-containing protein 2	26	140984	14	0.03
CONT	MAGI3_RAT	Membrane-associated guanylate kinase, WW and PDZ domain-containing protein 3	23	160464	23	0.03
CONT	MASP2_RAT	Mannan-binding lectin serine protease 2	25	75618	5	0.06
CONT	MAT2B_RAT	Methionine adenosyltransferase 2 subunit beta	31	37351	1	0.12
CONT	MBB1A_RAT	Myb-binding protein 1A	28	152191	9	0.03
BBN2	MED23_RAT	Mediator of RNA polymerase II transcription subunit 23	30	156130	2	0.03
CONT	MEP1A_RAT	Meprin A subunit alpha	462	85069	23	0.77
BBN2	MEP1A_RAT	Meprin A subunit alpha	322	85069	19	0.36
BBN1	MEP1A_RAT	Meprin A subunit alpha	330	85069	22	0.29
CONT	MEP1B_RAT	Meprin A subunit beta	88	79185	5	0.06
BBN2	MEP1B_RAT	Meprin A subunit beta	56	79185	5	0.06
CONT	MFN1_RAT	Mitofusin-1	25	83794	3	0.05
BBN1	MGMT_RAT	Methylated-DNA	15	22229	3	0.21
CONT	MO4L2_RAT	Mortality factor 4-like protein 2	26	32194	3	0.14
BBN1	MOES_RAT	Moesin	33	67697	12	0.07
CONT	MUC18_RAT	Cell surface glycoprotein MUC18	41	71282	3	0.06
CONT	MUG1_RAT	Murinoglobulin-1	1045	165221	64	0.65
BBN2	MUG1_RAT	Murinoglobulin-1	1730	165221	88	0.88
BBN1	MUG1_RAT	Murinoglobulin-1	1156	165221	71	0.65
BBN2	MUG2_RAT	Murinoglobulin-2	684	161487	44	0.38
CONT	MUP_RAT	Major urinary protein	1013	20724	40	41.11
BBN2	MUP_RAT	Major urinary protein	134	20724	14	1.28
BBN1	MUP_RAT	Major urinary protein	823	20724	27	8.49
CONT	MUP_RATRT	Major urinary protein (Fragments)	213	5284	9	19.49
BBN1	MUP_RATRT	Major urinary protein (Fragments)	371	5284	11	41.01
CONT	MXRA8_RAT	Matrix-remodeling-associated protein 8	176	42709	14	0.67
BBN2	MXRA8_RAT	Matrix-remodeling-associated protein 8	111	42709	12	0.83
BBN1	MXRA8_RAT	Matrix-remodeling-associated protein 8	226	42709	15	1.24
BBN1	MYCS_RAT	Protein S-Myc	17	46973	11	0.1
CONT	MYG_RAT	Myoglobin	193	17146	11	1.7
BBN2	MYG_RAT	Myoglobin	265	17146	11	2.46
BBN1	MYG_RAT	Myoglobin	121	17146	5	0.7
CONT	MYO5A_RAT	Unconventional myosin-Va	22	211630	13	0.02
BBN2	MYO9A_RAT	Unconventional myosin-IXa	34	301193	23	0.01
CONT	MYO9B_RAT	Unconventional myosin-IXb	31	224897	12	0.02
BBN2	MYOME_RAT	Myomegalin	32	261881	24	0.02
BBN2	NAR5_RAT	Ecto-ADP-ribosyltransferase 5	29	34179	6	0.13
CONT	NCOR1_RAT	Nuclear receptor corepressor 1 (Fragment)	23	57760	1	0.08
BBN1	NDRG1_RAT	Protein NDRG1	17	42927	2	0.11
CONT	NGAL_RAT	Neutrophil gelatinase-associated lipocalin	61	22461	5	0.47
BBN2	NGAL_RAT	Neutrophil gelatinase-associated lipocalin	73	22461	4	0.77
BBN1	NGAL_RAT	Neutrophil gelatinase-associated lipocalin	32	22461	2	0.21
BBN2	NKG2D_RAT	NKG2-D type II integral membrane protein	22	24422	2	0.2
CONT	NKX21_RAT	Homeobox protein Nkx-2.1	28	38530	1	0.12
BBN2	NONO_RAT	Non-POU domain-containing octamer-binding protein	20	54891	5	0.08
BBN2	NOTC3_RAT	Neurogenic locus notch homolog protein 3	24	244137	23	0.02
BBN2	NPFF_RAT	FMRFamide-related peptides	25	13144	3	0.38
CONT	NPTN_RAT	Neuroplastin	103	43904	3	0.1
BBN1	NPTN_RAT	Neuroplastin	42	43904	1	0.1
CONT	NPTXR_RAT	Neuronal pentraxin receptor	33	52338	2	0.09
BBN2	NPTXR_RAT	Neuronal pentraxin receptor	29	52338	6	0.09
BBN1	NQO1_RAT	NAD(P)H dehydrogenase [quinone] 1	175	30927	4	0.32
BBN1	NRX1A_RAT	Neurexin-1-alpha	26	167816	14	0.03
CONT	OBP_RAT	Odorant-binding protein	165	19687	7	0.55
BBN2	OBP_RAT	Odorant-binding protein	125	19687	7	0.92
BBN1	OBP_RAT	Odorant-binding protein	116	19687	8	0.91
CONT	ODBB_RAT	2-oxoisovalerate dehydrogenase subunit beta, mitochondrial	30	42796	6	0.11
BBN2	ODBB_RAT	2-oxoisovalerate dehydrogenase subunit beta, mitochondrial	39	42796	9	0.11
BBN1	ODBB_RAT	2-oxoisovalerate dehydrogenase subunit beta, mitochondrial	34	42796	4	0.11
CONT	ODPA_RAT	Pyruvate dehydrogenase E1 component subunit alpha, somatic form, mitochondrial	50	43199	9	0.11
CONT	OGFD3_RAT	2-oxoglutarate and iron-dependent oxygenase domain-containing protein 3	27	35363	7	0.13
CONT	ORC1_RAT	Origin recognition complex subunit 1	26	95699	5	0.05
BBN2	ORC1_RAT	Origin recognition complex subunit 1	25	95699	12	0.05
BBN2	PAK1_RAT	Serine/threonine-protein kinase PAK 1	28	60540	7	0.08
BBN2	PANX1_RAT	Pannexin-1	28	48042	1	0.1
CONT	PCLO_RAT	Protein piccolo	17	552376	22	0.01
BBN1	PDZD2_RAT	PDZ domain-containing protein 2	25	293709	32	0.01
CONT	PEPC_RAT	Gastricsin	37	42806	2	0.11
BBN2	PEPC_RAT	Gastricsin	29	42806	1	0.11
BBN1	PEPC_RAT	Gastricsin	37	42806	1	0.11
BBN2	PGH1_RAT	Prostaglandin G/H synthase 1	25	68988	5	0.06
BBN1	PGH1_RAT	Prostaglandin G/H synthase 1	24	68988	5	0.06
BBN1	PHLB1_RAT	Pleckstrin homology-like domain family B member 1 (Fragment)	33	93484	16	0.05
BBN1	PHLD_RAT	Phosphatidylinositol-glycan-specific phospholipase D	29	93722	4	0.05
CONT	PIGR_RAT	Polymeric immunoglobulin receptor	63	84745	8	0.23
BBN2	PIGR_RAT	Polymeric immunoglobulin receptor	107	84745	17	0.29
BBN1	PIGR_RAT	Polymeric immunoglobulin receptor	32	84745	8	0.11
CONT	PIP_RAT	Prolactin-inducible protein homolog	406	16428	24	1.19
BBN2	PIP_RAT	Prolactin-inducible protein homolog	93	16428	12	1.17
BBN1	PIP_RAT	Prolactin-inducible protein homolog	168	16428	11	1.79
BBN2	PITM1_RAT	Membrane-associated phosphatidylinositol transfer protein 1	26	134899	2	0.03
BBN2	PLCB1_RAT	1-phosphatidylinositol 4,5-bisphosphate phosphodiesterase beta-1	26	138257	11	0.03
BBN1	PLCB1_RAT	1-phosphatidylinositol 4,5-bisphosphate phosphodiesterase beta-1	20	138257	1	0.03
CONT	PLCD1_RAT	1-phosphatidylinositol 4,5-bisphosphate phosphodiesterase delta-1	32	85908	4	0.05
BBN2	PLCD1_RAT	1-phosphatidylinositol 4,5-bisphosphate phosphodiesterase delta-1	31	85908	7	0.05
BBN1	PLCD1_RAT	1-phosphatidylinositol 4,5-bisphosphate phosphodiesterase delta-1	23	85908	5	0.05
BBN1	PLEC_RAT	Plectin	34	533214	78	0.01
CONT	PLMN_RAT	Plasminogen	76	90477	17	0.05
BBN2	PLMN_RAT	Plasminogen	143	90477	15	0.16
BBN1	PLMN_RAT	Plasminogen	60	90477	8	0.05
BBN2	PON1_RAT	Serum paraoxonase/arylesterase 1	70	39333	3	0.12
BBN1	PON1_RAT	Serum paraoxonase/arylesterase 1	68	39333	2	0.12
BBN2	PPIG_RAT	Peptidyl-prolyl cis-trans isomerase G	28	88326	12	0.05
BBN1	PPIG_RAT	Peptidyl-prolyl cis-trans isomerase G	29	88326	7	0.05
CONT	PRAX_RAT	Periaxin	29	146309	8	0.03
BBN1	PRDX1_RAT	Peroxiredoxin-1	51	22095	4	0.47
BBN2	PRDX2_RAT	Peroxiredoxin-2	92	21770	4	0.22
BBN1	PRDX2_RAT	Peroxiredoxin-2	171	21770	5	1.18
CONT	PRP6_RAT	Pre-mRNA-processing factor 6	30	106697	5	0.04
BBN1	PRVA_RAT	Parvalbumin alpha	38	11918	2	0.42
BBN2	PSA1_RAT	Proteasome subunit alpha type-1	34	29499	6	0.16
BBN1	PSA1_RAT	Proteasome subunit alpha type-1	28	29499	5	0.16
CONT	PSB8_RAT	Proteasome subunit beta type-8	27	30550	6	0.15
CONT	PTGDS_RAT	Prostaglandin-H2 D-isomerase	145	21288	7	0.5
BBN2	PTGDS_RAT	Prostaglandin-H2 D-isomerase	45	21288	5	0.22
BBN1	PTGDS_RAT	Prostaglandin-H2 D-isomerase	93	21288	5	0.82
BBN2	PTGR1_RAT	Prostaglandin reductase 1	81	35695	3	0.13
BBN2	PTPRZ_RAT	Receptor-type tyrosine-protein phosphatase zeta	22	255183	2	0.02
BBN1	PTPRZ_RAT	Receptor-type tyrosine-protein phosphatase zeta	26	255183	7	0.02
BBN1	RABE2_RAT	Rab GTPase-binding effector protein 2	26	61936	8	0.07
CONT	RBM5_RAT	RNA-binding protein 5	30	92295	11	0.05
BBN2	RBM5_RAT	RNA-binding protein 5	43	92295	15	0.05
BBN1	RBM5_RAT	RNA-binding protein 5	36	92295	20	0.05
BBN2	RET4_RAT	Retinol-binding protein 4	26	23205	1	0.2
CONT	RHDF1_RAT	Inactive rhomboid protein 1	22	97199	6	0.05
BBN1	RIMS2_RAT	Regulating synaptic membrane exocytosis protein 2	23	175804	25	0.02
CONT	RL40_RAT	Ubiquitin-60S ribosomal protein L40	64	14719	7	0.34
BBN2	RL40_RAT	Ubiquitin-60S ribosomal protein L40	143	14719	10	0.33
BBN1	RL40_RAT	Ubiquitin-60S ribosomal protein L40	60	14719	4	0.33
CONT	RM37_RAT	39S ribosomal protein L37, mitochondrial	25	48335	8	0.09
BBN2	RMD2_RAT	Regulator of microtubule	13	47187	8	0.1
BBN1	RMD2_RAT	Regulator of microtubule dynamics protein 2	18	47187	1	0.1
CONT	RN146_RAT	E3 ubiquitin-protein ligase RNF146	29	38201	5	0.12
BBN2	RN146_RAT	E3 ubiquitin-protein ligase RNF146	25	38201	8	0.12
CONT	RNS1G_RAT	Ribonuclease pancreatic gamma-type	51	16924	2	0.29
BBN2	RNS1G_RAT	Ribonuclease pancreatic gamma-type	50	16924	1	0.29
CONT	ROBO1_RAT	Roundabout homolog 1	22	180636	4	0.02
BBN2	ROBO1_RAT	Roundabout homolog 1	24	180636	16	0.02
BBN1	ROBO4_RAT	Roundabout homolog 4	17	102516	2	0.04
CONT	ROCK2_RAT	Rho-associated protein kinase 2	32	160287	8	0.03
BBN2	RPN2_RAT	Dolichyl-diphosphooligosaccharide--protein glycosyltransferase subunit 2	23	69035	2	0.07
CONT	RRMJ3_RAT	pre-rRNA processing protein FTSJ3	27	94709	11	0.05
CONT	RS27A_RAT	Ubiquitin-40S ribosomal protein S27a	59	17939	1	0.27
BBN2	RS27A_RAT	Ubiquitin-40S ribosomal protein S27a	159	17939	5	1.07
BBN1	RS27A_RAT	Ubiquitin-40S ribosomal protein S27a	145	17939	11	0.27
BBN2	RT10_RAT	28S ribosomal protein S10, mitochondrial	31	17948	2	0.27
CONT	RYR2_RAT	Ryanodine receptor 2	20	562594	15	0.01
BBN2	RYR2_RAT	Ryanodine receptor 2	24	562594	27	0.01
BBN1	RYR2_RAT	Ryanodine receptor 2	16	562594	54	0.01
CONT	S10A9_RAT	Protein S100-A9	111	13136	6	1.67
BBN2	S10A9_RAT	Protein S100-A9	243	13136	8	8.49
BBN1	S10A9_RAT	Protein S100-A9	98	13136	5	1.61
CONT	S22AH_RAT	Solute carrier family 22 member 17	19	55765	1	0.08
CONT	SAMP_RAT	Serum amyloid P-component	162	26159	5	0.64
BBN2	SAMP_RAT	Serum amyloid P-component	75	26159	3	0.39
BBN1	SAMP_RAT	Serum amyloid P-component	177	26159	5	0.63
CONT	SCFD1_RAT	Sec1 family domain-containing protein 1	23	72217	7	0.06
CONT	SEM4F_RAT	Semaphorin-4F	20	84245	3	0.05
BBN2	SEM4F_RAT	Semaphorin-4F	21	84245	10	0.05
CONT	SEP10_RAT	Septin-10	20	53005	8	0.09
BBN1	SEPT9_RAT	Septin-9	26	63752	17	0.07
BBN2	SERC5_RAT	Serine incorporator 5	21	51820	4	0.09
BBN2	SL9A1_RAT	Sodium/hydrogen exchanger 1	24	91589	3	0.05
CONT	SLC31_RAT	Neutral and basic amino acid transport protein rBAT	39	78457	5	0.06
BBN2	SLC31_RAT	Neutral and basic amino acid transport protein rBAT	109	78457	10	0.32
BBN1	SLC31_RAT	Neutral and basic amino acid transport protein rBAT	51	78457	3	0.06
CONT	SODC_RAT	Superoxide dismutase [Cu-Zn]	1296	15902	25	24.43
BBN2	SODC_RAT	Superoxide dismutase [Cu-Zn]	358	15902	7	3.96
BBN1	SODC_RAT	Superoxide dismutase [Cu-Zn]	147	15902	4	1.22
CONT	SODE_RAT	Extracellular superoxide dismutase [Cu-Zn]	108	26603	3	0.63
BBN2	SODE_RAT	Extracellular superoxide dismutase [Cu-Zn]	114	26603	4	0.62
BBN1	SODE_RAT	Extracellular superoxide dismutase [Cu-Zn]	93	26603	5	0.62
CONT	SPA3K_RAT	Serine protease inhibitor A3K	2255	46532	68	3.1
BBN2	SPA3K_RAT	Serine protease inhibitor A3K	2032	46532	52	2.35
BBN1	SPA3K_RAT	Serine protease inhibitor A3K	2217	46532	59	4.79
CONT	SPA3L_RAT	Serine protease inhibitor A3L	1898	46248	64	2.42
BBN2	SPA3L_RAT	Serine protease inhibitor A3L	1113	46248	40	2.07
BBN1	SPA3L_RAT	Serine protease inhibitor A3L	2323	46248	60	3.85
BBN2	SPA3M_RAT	Serine protease inhibitor A3M (Fragment)	70	46066	4	0.21
BBN1	SPA3M_RAT	Serine protease inhibitor A3M (Fragment)	71	46066	7	0.21
CONT	SPA3N_RAT	Serine protease inhibitor A3N	47	46622	1	0.1
BBN2	SPA3N_RAT	Serine protease inhibitor A3N	367	46622	23	1.53
BBN1	SPA3N_RAT	Serine protease inhibitor A3N	27	46622	8	0.2
BBN2	SPEG_RAT	Striated muscle-specific serine/threonine-protein kinase	20	353948	26	0.01
CONT	SPT32_RAT	Spermatogenesis-associated protein 32	23	38556	4	0.12
BBN1	SPT32_RAT	Spermatogenesis-associated protein 32	22	38556	5	0.12
BBN1	SRPX_RAT	Sushi repeat-containing protein SRPX	16	51526	4	0.09
BBN2	SUCO_RAT	SUN domain-containing ossification factor	39	139173	1	0.03
BBN1	SUCO_RAT	SUN domain-containing ossification factor	32	139173	13	0.03
BBN2	SUGT1_RAT	Suppressor of G2 allele of SKP1 homolog	17	38067	3	0.12
BBN2	SYCP3_RAT	Synaptonemal complex protein 3	28	29714	3	0.16
BBN2	SYFA_RAT	Phenylalanine--tRNA ligase alpha subunit	28	57684	5	0.08
BBN2	SYNG1_RAT	Synapse differentiation-inducing gene protein 1	20	28366	4	0.16
BBN1	SYYM_RAT	Tyrosine--tRNA ligase, mitochondrial	25	52594	7	0.09
BBN2	TCPR1_RAT	Tectonin beta-propeller repeat-containing protein 1	25	130104	5	0.03
CONT	TCTP_RAT	Translationally-controlled tumor protein	26	19450	1	0.25
CONT	TEP1_RAT	Telomerase protein component 1	25	291524	18	0.02
BBN2	TEP1_RAT	Telomerase protein component 1	24	291524	23	0.02
BBN1	TEP1_RAT	Telomerase protein component 1	30	291524	16	0.03
CONT	TF_RAT	Tissue factor	27	33423	3	0.14
BBN2	TF2B_RAT	Transcription initiation factor IIB	22	34797	12	0.13
CONT	TFF3_RAT	Trefoil factor 3	26	8938	1	0.59
CONT	TFP11_RAT	Tuftelin-interacting protein 11	24	96091	4	0.05
CONT	THEG_RAT	Testicular haploid expressed gene protein	28	43421	3	0.11
BBN1	THIKA_RAT	3-ketoacyl-CoA thiolase A, peroxisomal	23	43806	1	0.11
BBN1	THIO_RAT	Thioredoxin	75	11666	4	1.05
CONT	THOP1_RAT	Thimet oligopeptidase	22	78335	10	0.06
CONT	THRB_RAT	Prothrombin	55	70367	9	0.13
BBN2	THRB_RAT	Prothrombin	94	70367	13	0.2
CONT	TIMD2_RAT	T-cell immunoglobulin and mucin domain-containing protein 2	24	38520	2	0.12
BBN2	TLR4_RAT	Toll-like receptor 4	17	96010	13	0.05
BBN2	TM165_RAT	Transmembrane protein 165	22	34787	2	0.13
CONT	TNNI1_RAT	Troponin I, slow skeletal muscle	19	21711	10	0.22
BBN2	TNNI1_RAT	Troponin I, slow skeletal muscle	23	21711	4	0.22
BBN2	TPC2L_RAT	Trafficking protein particle complex subunit 2-like protein	26	16021	2	0.3
CONT	TPIS_RAT	Triosephosphate isomerase	62	26832	2	0.18
CONT	TPM2_RAT	Tropomyosin beta chain	54	32817	10	0.14
BBN2	TPM2_RAT	Tropomyosin beta chain	50	32817	10	0.14
BBN1	TPM2_RAT	Tropomyosin beta chain	40	32817	18	0.14
BBN2	TRAF6_RAT	TNF receptor-associated factor 6	24	60213	7	0.07
CONT	TRFE_RAT	Serotransferrin	1682	76346	69	2.3
BBN2	TRFE_RAT	Serotransferrin	2798	76346	103	3.39
BBN1	TRFE_RAT	Serotransferrin	1896	76346	79	4.77
BBN1	TRPC3_RAT	Short transient receptor potential channel 3	21	95621	3	0.05
CONT	TRYB2_RAT	Tryptase beta-2	26	30488	2	0.15
CONT	TSP4_RAT	Thrombospondin-4	14	108145	3	0.04
CONT	TTHY_RAT	Transthyretin	90	15710	3	0.31
BBN2	TTHY_RAT	Transthyretin	217	15710	4	1.24
BBN1	TTHY_RAT	Transthyretin	65	15710	1	0.31
CONT	UBAC1_RAT	Ubiquitin-associated domain-containing protein 1	24	45518	5	0.1
BBN1	UBP15_RAT	Ubiquitin carboxyl-terminal hydrolase 15	26	109185	3	0.04
BBN2	UGGG1_RAT	UDP-glucose:glycoprotein glucosyltransferase 1	21	176320	11	0.03
CONT	UK114_RAT	Ribonuclease UK114	80	14295	2	0.35
BBN2	UK114_RAT	Ribonuclease UK114	93	14295	2	0.34
CONT	UP1_RAT	Urinary protein 1	122	10952	6	2.16
BBN2	UP1_RAT	Urinary protein 1	53	10952	3	0.46
BBN1	UP1_RAT	Urinary protein 1	114	10952	2	1.13
CONT	UP2_RAT	Urinary protein 2	131	11060	6	1.14
BBN2	UP2_RAT	Urinary protein 2	68	11060	3	0.46
BBN1	UP2_RAT	Urinary protein 2	118	11060	7	2.08
CONT	UP3_RAT	Urinary protein 3	28	11092	1	0.46
BBN2	UP3_RAT	Urinary protein 3	29	11092	4	0.46
CONT	UROK_RAT	Urokinase-type plasminogen activator	47	47926	4	0.1
BBN2	UROK_RAT	Urokinase-type plasminogen activator	94	47926	9	0.09
BBN1	UROK_RAT	Urokinase-type plasminogen activator	104	47926	8	0.09
CONT	UROM_RAT	Uromodulin	508	71015	46	0.74
BBN2	UROM_RAT	Uromodulin	125	71015	18	0.2
BBN1	UROM_RAT	Uromodulin	401	71015	33	0.53
CONT	VEGFD_RAT	Vascular endothelial growth factor D	22	37088	2	0.13
BBN2	VIME_RAT	Vimentin	34	53700	4	0.08
BBN2	VINC_RAT	Vinculin	23	116542	15	0.04
CONT	VTDB_RAT	Vitamin D-binding protein	187	53509	11	0.38
BBN2	VTDB_RAT	Vitamin D-binding protein	106	53509	6	0.27
BBN1	VTDB_RAT	Vitamin D-binding protein	89	53509	7	0.17
CONT	WNT4_RAT	Protein Wnt-4	22	39018	5	0.12
CONT	XIRP2_RAT	Xin actin-binding repeat-containing protein 2	23	373751	10	0.01
BBN2	XRCC1_RAT	DNA repair protein XRCC1	16	68794	3	0.07
BBN2	Z518A_RAT		19	0	19	0.03
BBN2	ZA2G_RAT	Zinc-alpha-2-glycoprotein	79	33996	2	0.29
CONT	ZCHC4_RAT	Zinc finger CCHC domain-containing protein 4	24	55991	3	0.08
BBN2	ZEP2_RAT	Human immunodeficiency virus type I enhancer-binding protein 2 homolog	23	267259	15	0.02
CONT	ZFR_RAT	Zinc finger RNA-binding protein	26	116745	8	0.04
BBN2	ZFY26_RAT	Zinc finger FYVE domain-containing protein 26	34	284034	21	0.02
CONT	ZN622_RAT	Zinc finger protein 622	26	43862	4	0.1
			Score	Mass	Matches	emPAI

## Sheet: Comparative analysis
Common elements in "Cont", "BBN2" and "BBN1":					Elements only in "BBN1":			Elements only in "Cont":				Elements only in "BBN2":			Common elements in "BBN1" and "BBN2":
ALBU_RAT					GSTA3_RAT			LEG9_RAT				KNG1_RAT			HBB2_RAT
SPA3K_RAT					HSP7C_RAT			FER_RAT				EZRI_RAT			SPA3M_RAT
SPA3L_RAT					NQO1_RAT			PRAX_RAT				AMPN_RAT			KNT2_RAT
MUP_RAT					THIO_RAT			DYN3_RAT				GSTA2_RAT			GSTA4_RAT
EGF_RAT					ADA_RAT			THEG_RAT				EST5_RAT			PRDX2_RAT
SODC_RAT					PRDX1_RAT			MBB1A_RAT				MED23_RAT			PON1_RAT
AMYP_RAT					PRVA_RAT			KAD8_RAT				GUC2F_RAT			CAH1_RAT
CYTC_RAT					1433Z_RAT			MO4L2_RAT				TPC2L_RAT			AFAM_RAT
BGLR_RAT					MOES_RAT			RM37_RAT				CBPA1_RAT			PLCB1_RAT
MUG1_RAT					PHLD_RAT			PRP6_RAT				COM1_RAT			PGH1_RAT
KACB_RAT					KIF3C_RAT			ZCHC4_RAT				LMNB1_RAT			CALM_RAT
DNAS1_RAT					F110C_RAT			TIMD2_RAT				DNA2_RAT			DPP6_RAT
IGG2A_RAT					LRIT1_RAT			KPCD_RAT				DUS12_RAT			GSTP1_RAT
MEP1A_RAT					ESPN_RAT			DIAC_RAT				LONP2_RAT			S10A9_RAT
KLK1_RAT					FABP4_RAT			MYO5A_RAT				ACTT1_RAT			PSA1_RAT
MYG_RAT					SEPT9_RAT			HIF1A_RAT				IFRD1_RAT			SUCO_RAT
OBP_RAT					UBP15_RAT			MAGI3_RAT				XRCC1_RAT			RMD2_RAT
CO3_RAT					RABE2_RAT			TSP4_RAT				K2C4_RAT			K2C7_RAT
KNT1_RAT					SYYM_RAT			DYH7_RAT				PTGR1_RAT			GSTA1_RAT
CERU_RAT					LANC1_RAT			DPP4_RAT				AL3A1_RAT			PPIG_RAT
A1M_RAT					GNN_RAT			MYO9B_RAT				ALDR_RAT			I23O1_RAT
K2C6A_RAT					ADO_RAT			6PGL_RAT				CBPQ_RAT			APC_RAT
K2C8_RAT					NDRG1_RAT			CUBN_RAT				ZFY26_RAT			PTPRZ_RAT
CADH1_RAT					SRPX_RAT			HYAL1_RAT				VIME_RAT
FETUB_RAT					PLEC_RAT			TF_RAT				MYO9A_RAT
TRFE_RAT					PHLB1_RAT			JPH4_RAT				INP5E_RAT
HPT_RAT					APOB_RAT			KDIS_RAT				MYOME_RAT
FINC_RAT					KAT6A_RAT			ZFR_RAT				GOGA4_RAT
IL4RA_RAT					DGKZ_RAT			TFF3_RAT				IC1_RAT
UP2_RAT					CAND1_RAT			HA12_RAT				EST1C_RAT
AMBP_RAT					CP013_RAT			TFP11_RAT				NAR5_RAT
UROM_RAT					KLHL7_RAT			JAG1_RAT				DCXR_RAT
KLK7_RAT					NRX1A_RAT			RHDF1_RAT				SYFA_RAT
LAC2_RAT					PDZD2_RAT			THOP1_RAT				CACO1_RAT
CBG_RAT					FOSL2_RAT			GRM3_RAT				CEAM3_RAT
APOH_RAT					RIMS2_RAT			SEP10_RAT				ATP9B_RAT
A1BG_RAT					CES1D_RAT			GAK_RAT				AGRIN_RAT
PTGDS_RAT					LZTS2_RAT			CNDH2_RAT				JMJD8_RAT
APOE_RAT					HEM2_RAT			EFGM_RAT				BMP3B_RAT
TPM2_RAT					CTP5B_RAT			LIFR_RAT				NPFF_RAT
DYHC2_RAT					EF2_RAT			DNJA2_RAT				NOTC3_RAT
SAMP_RAT					MYCS_RAT			K1C17_RAT				DYH1_RAT
RBM5_RAT					MGMT_RAT			RRMJ3_RAT				VINC_RAT
SODE_RAT					K0319_RAT			PSB8_RAT				ACSL3_RAT
PLCD1_RAT					ADH7_RAT			OGFD3_RAT				CEP95_RAT
IGHG1_RAT					THIKA_RAT			CTBP2_RAT				TM165_RAT
PIP_RAT					ADRB3_RAT			IGG2C_RAT				CART_RAT
A1AT_RAT					TRPC3_RAT			CCD71_RAT				TF2B_RAT
LRP2_RAT					DAB2P_RAT			MAGI2_RAT				GDN_RAT
AKIR2_RAT					ENOB_RAT			HVR01_RAT				ZA2G_RAT
NGAL_RAT					ROBO4_RAT			FACD2_RAT				SEM4F_RAT
GELS_RAT					BFAR_RAT			PCLO_RAT				UGGG1_RAT
K1C10_RAT					MACF1_RAT			ABHEB_RAT				5HT6R_RAT
K1C19_RAT					AT2B1_RAT			MUC18_RAT				CP086_RAT
K2C1B_RAT					CADH6_RAT			AMOL2_RAT				RET4_RAT
GRN_RAT								BRCA2_RAT				Z518A_RAT
LEG5_RAT								LPPR4_RAT				TLR4_RAT
MXRA8_RAT								CK2N2_RAT				SUGT1_RAT
DPP2_RAT								CELR2_RAT				MUG2_RAT
A1AG_RAT								S22AH_RAT				HA11_RAT
UP1_RAT								CE57L_RAT				RT10_RAT
PLMN_RAT												CATD_RAT
CRP_RAT												NPTXR_RAT
HEMO_RAT												SYCP3_RAT
B2MG_RAT												LIPA4_RAT
CATB_RAT												FA12_RAT
PIGR_RAT												FMR1_RAT
RS27A_RAT												TCPR1_RAT
ANTR1_RAT												SL9A1_RAT
UROK_RAT												TRAF6_RAT
CAD23_RAT												K6PL_RAT
CO4_RAT												ZEP2_RAT
APOM_RAT												ALDOA_RAT
CAC1E_RAT												SPEG_RAT
RYR2_RAT												SYNG1_RAT
A1I3_RAT												AT12A_RAT
FIBB_RAT												PAK1_RAT
VTDB_RAT												PANX1_RAT
HRG_RAT												PITM1_RAT
ITIH3_RAT												RPN2_RAT
FIBG_RAT												NKG2D_RAT
FIBA_RAT												SERC5_RAT
ACTB_RAT												NONO_RAT
HBB1_RAT
TTHY_RAT
HBA_RAT
APOA1_RAT
SPA3N_RAT
RL40_RAT
FETUA_RAT
ANGT_RAT
SLC31_RAT
IGG2B_RAT
GP2_RAT
ODBB_RAT
GSTM1_RAT
TEP1_RAT
PEPC_RAT
CFAD_RAT
CLUS_RAT
FBLN3_RAT
BFSP1_RAT
