# Supplementary material for: Comparative proteomic analyses of urine from rat urothelial carcinoma chemically induced by exposure to N -butyl- N -(4-hydroxybutyl)-nitrosamine
Source: Royal Society of Chemistry journal article supplement (doi:10.1039/c4mb00606b), 2015-02-25
Supplement: c4mb00606b13.pdf [file c4mb00606b13.pdf]

**Supplemental Table S1:** Average body weight, food and water intake for Wistar rats exposed to BBN.

| Groups                                          | Initial body weight (g) | Final body weight (g) | Initial food intake (g/rat/day) | Final food intake (g/rat/day) | Initial water intake (g/rat/day) | Final water intake (g/rat/day) |
|-------------------------------------------------|-------------------------|-----------------------|---------------------------------|-------------------------------|----------------------------------|--------------------------------|
| CONT<br>(20-weeks)                              | 122.55±1.91             | 260.61±5.00           | 14.60                           | 14.31                         | 19.47                            | 23.98                          |
| BBN1<br>(20-weeks of BBN)                       | 123.85±2.16             | 275.97±9.38           | 15.45                           | 16.09                         | 25.93                            | 31.52                          |
| CONT<br>(28-weeks)                              | 124.52±1.64             | 288.06±6.91           | 15.65                           | 19.26                         | 22.83                            | 29.54                          |
| BBN2<br>(20-weeks of BBN +<br>8 weeks of water) | 120.02±1.24             | 266.79±3.46*          | 14.62                           | 18.11                         | 26.07                            | 29.97                          |
| (* <i>p</i> <0.05 vs. CONT)                     |                         |                       |                                 |                               |                                  |                                |

**Supplemental Table S2:** List of all identified proteins by GeLC-MS/MS and unique proteins *per* group.
