# Supplementary figures and images for: Comparative proteomic analyses of urine from rat urothelial carcinoma chemically induced by exposure to N -butyl- N -(4-hydroxybutyl)-nitrosamine
Source: Royal Society of Chemistry journal article supplement (doi:10.1039/c4mb00606b), 2015-02-25

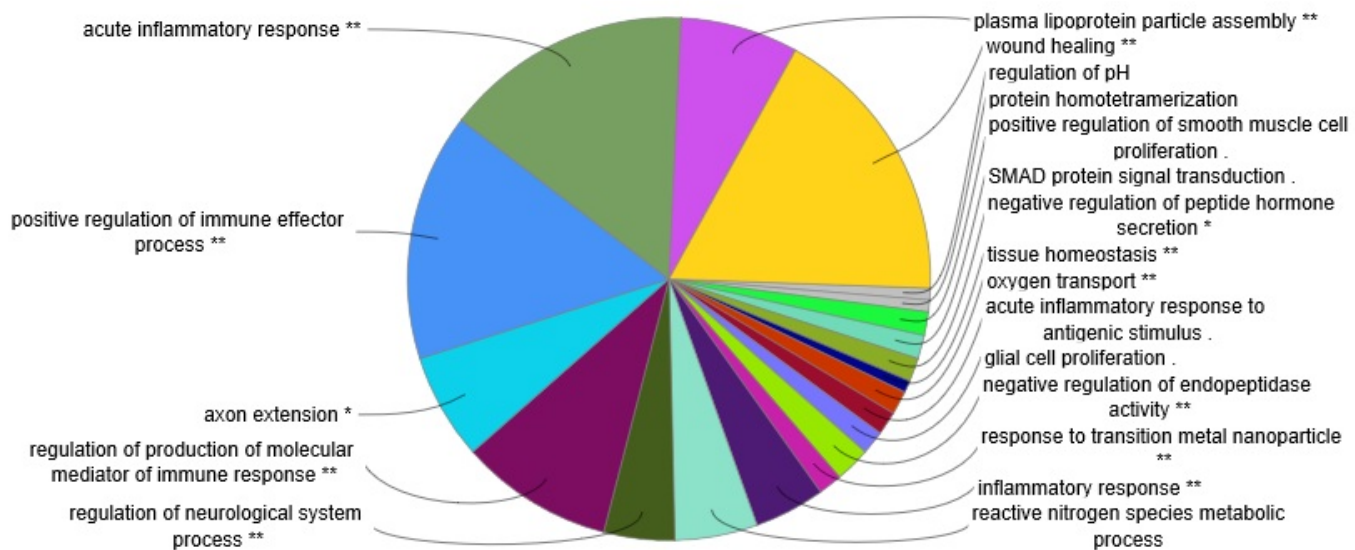

Supplement: c4mb00606b10.pdf [file c4mb00606b10.pdf]

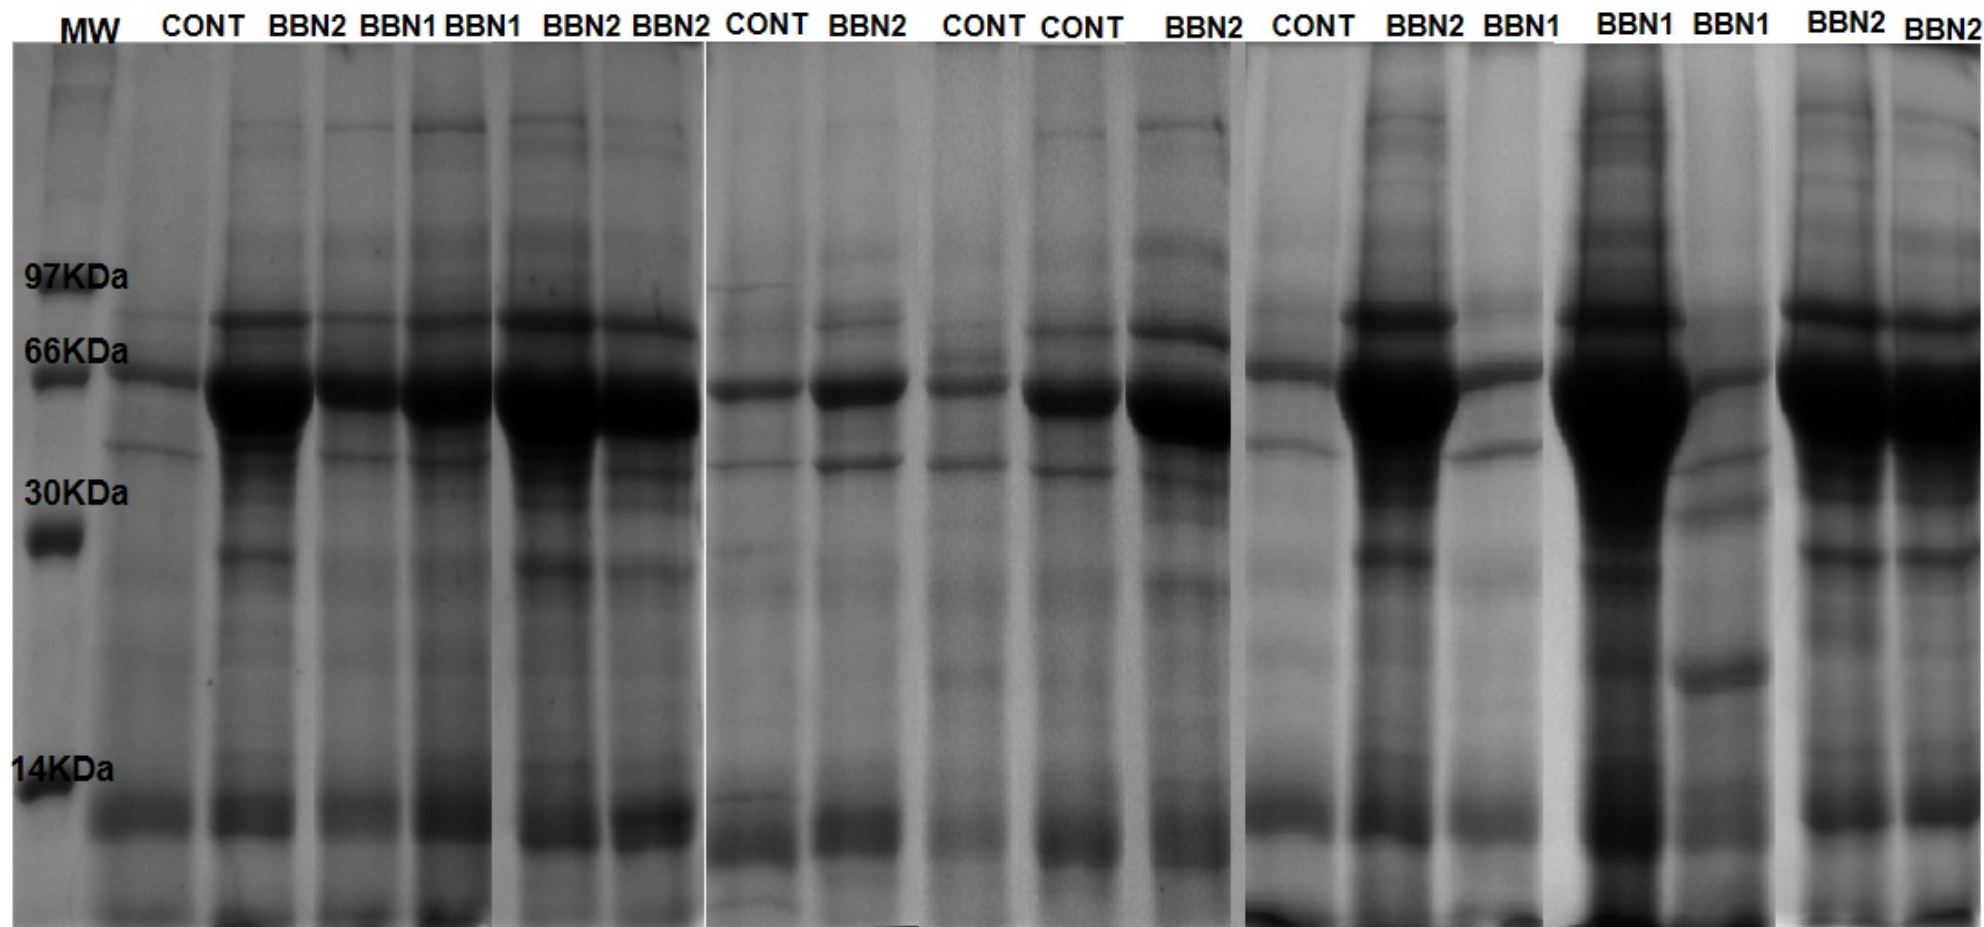

Supplement: c4mb00606b3.pdf [file c4mb00606b3.pdf]

CONT

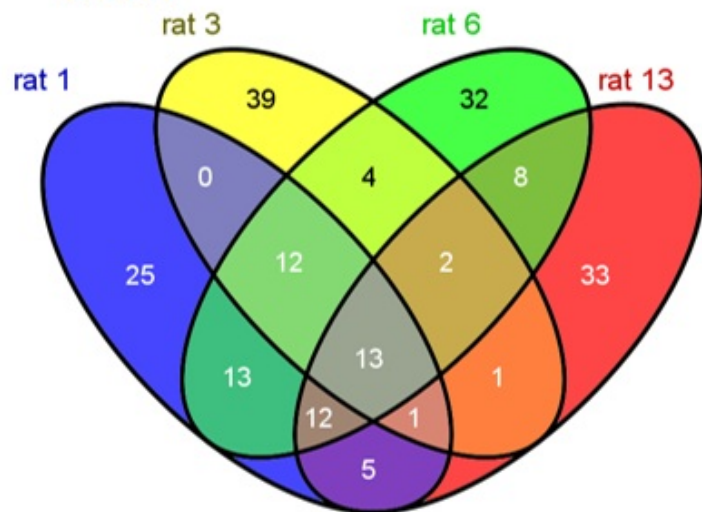

BBN1

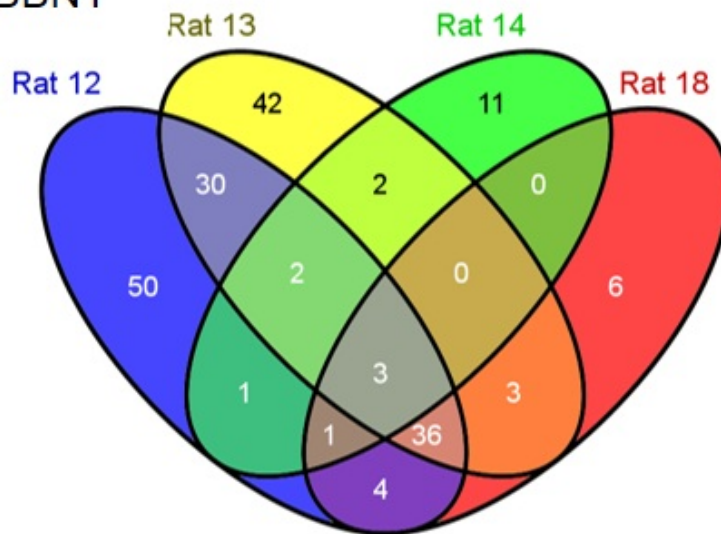

BBN2

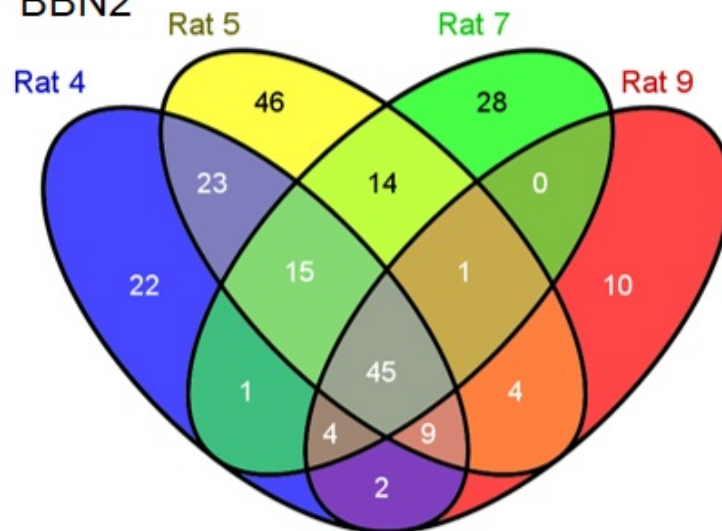

Supplement: c4mb00606b4.pdf [file c4mb00606b4.pdf]

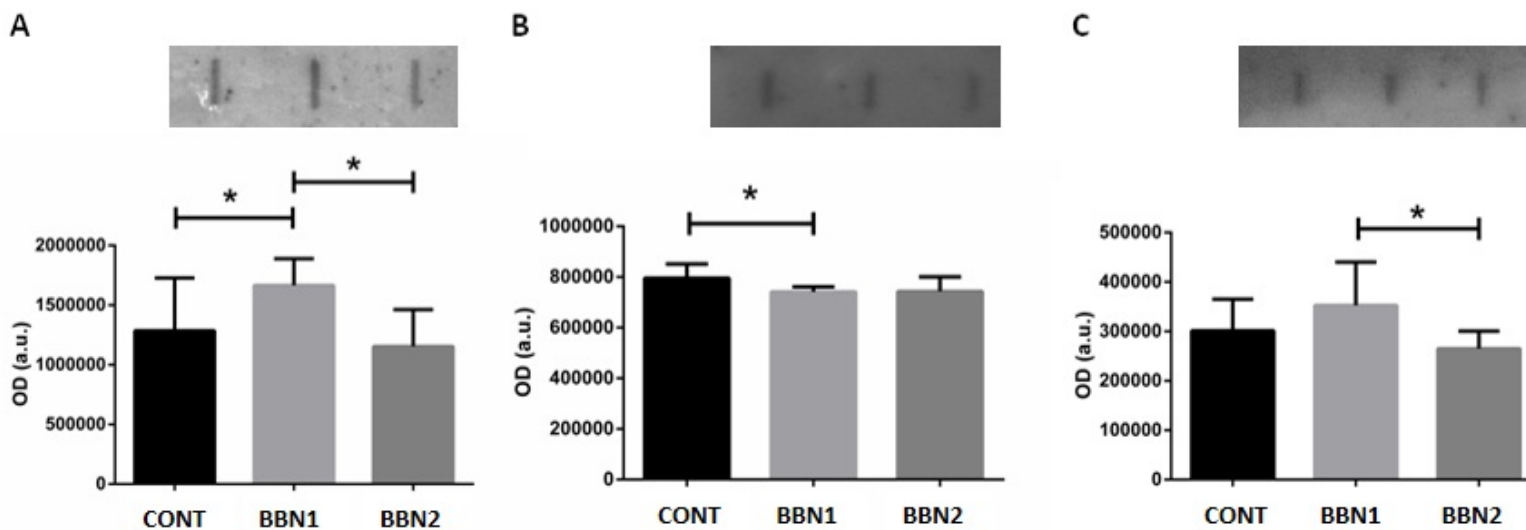

Supplement: c4mb00606b7.pdf [file c4mb00606b7.pdf]

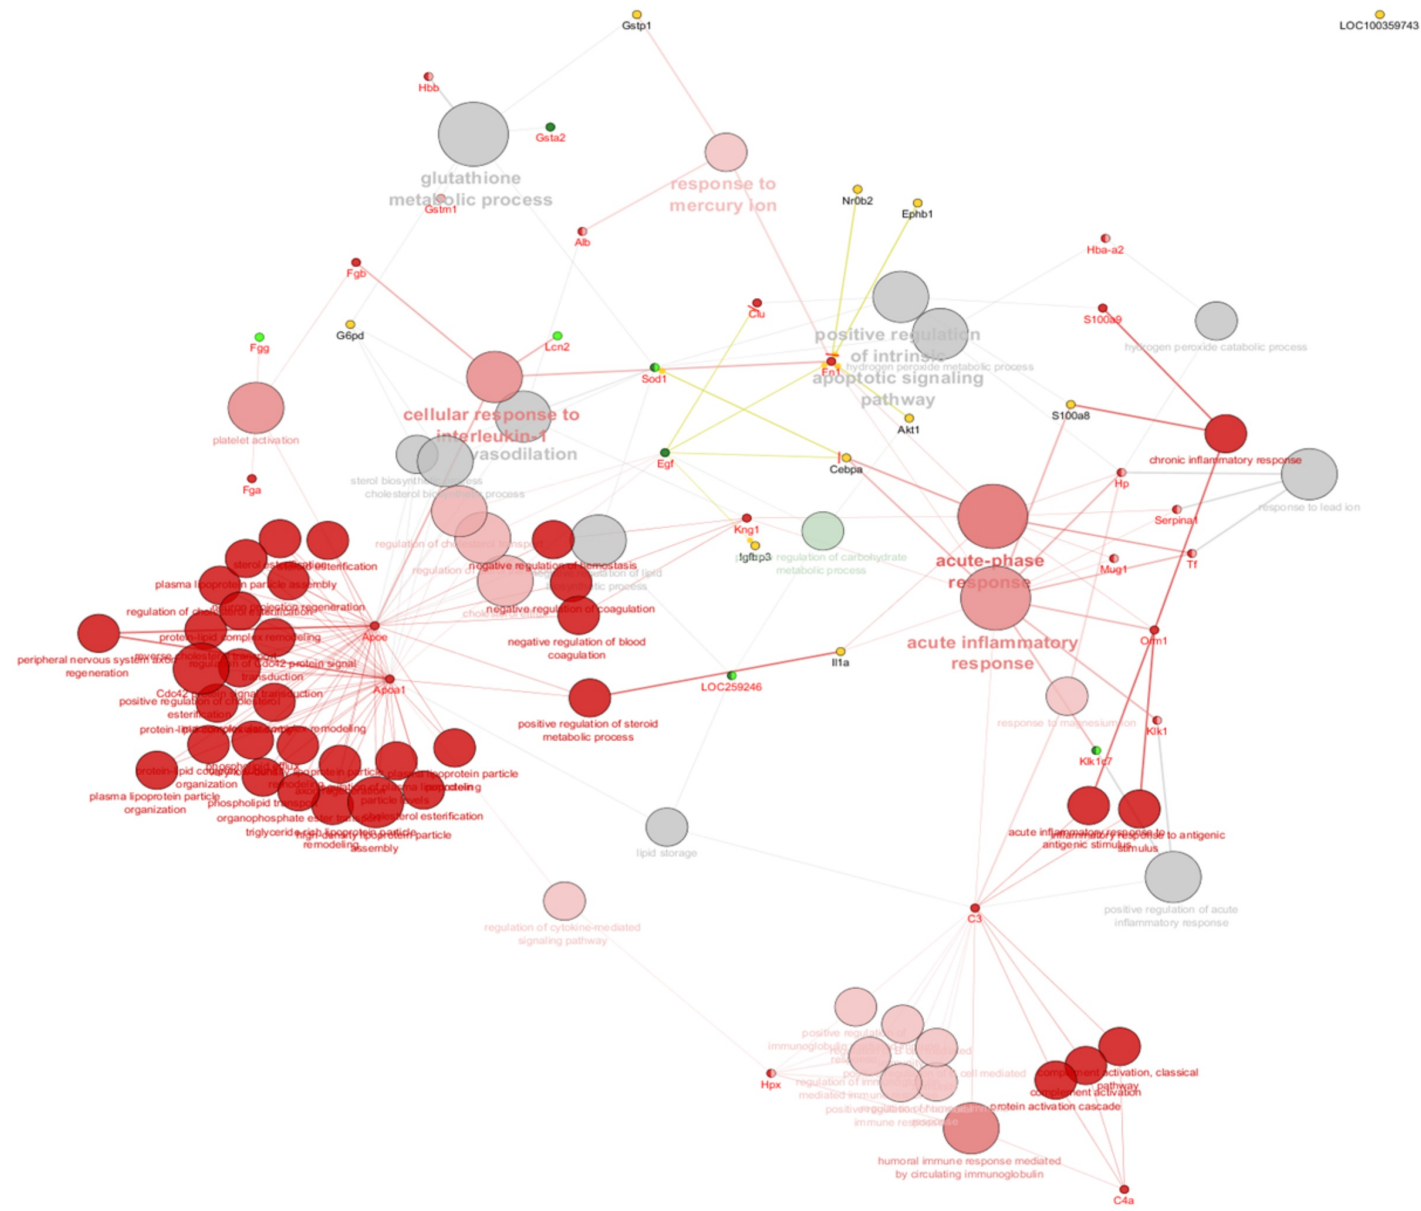

Supplement: c4mb00606b8.pdf [file c4mb00606b8.pdf]

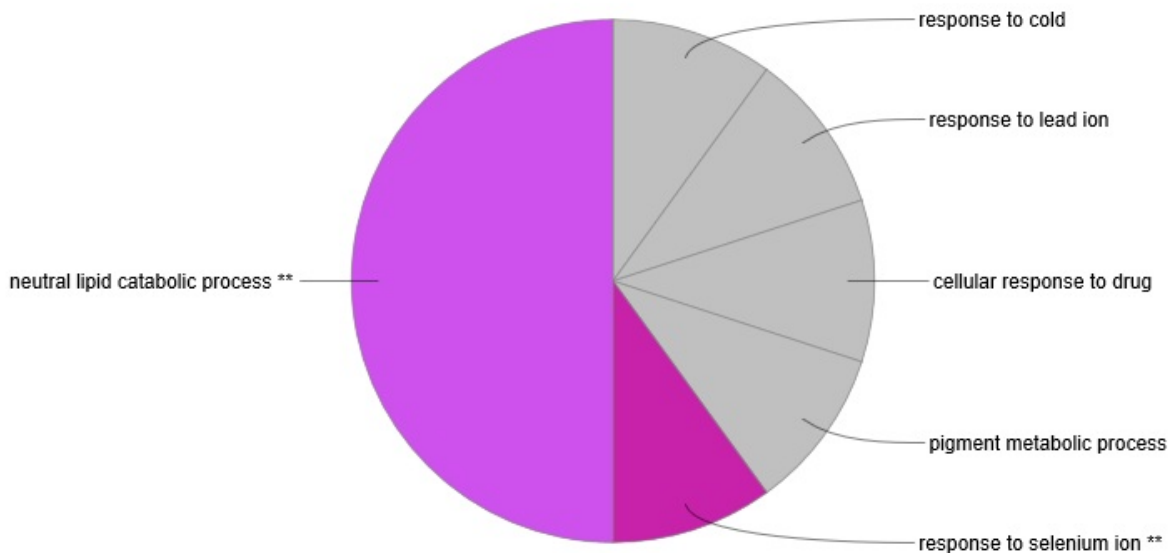

Supplement: c4mb00606b9.pdf [file c4mb00606b9.pdf]
